# Supplementary material for: Heat shock factor 1-mediated transcription activation of Omi/HtrA2 induces myocardial mitochondrial apoptosis in the aging heart
Source: publisher site journal article supplement (doi:10.18632/aging.102361), 2019-10-18
Supplement: Supplementary file [file aging-v11i20-102361-supplementary-material-SD1.pdf]

**SUPPLEMENTARY FIGURES**

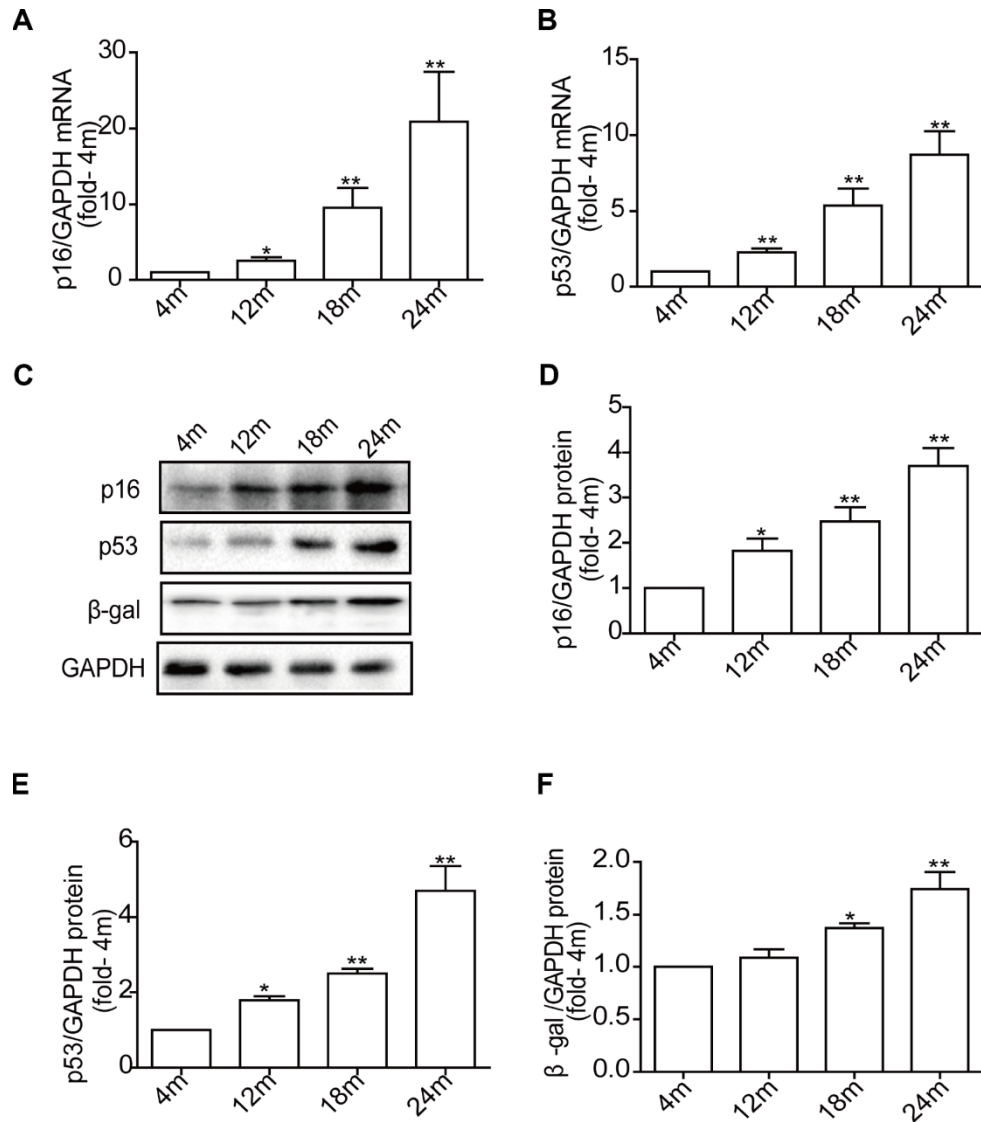

**Supplementary Figure 1. Identification of the aging mice.** mRNA expression of p16 (A) and p53 (B) were increased, protein expression of p16, p53 and beta-gal (C-F) were increased with aging. Data are represented as mean +/- SEM. n = 6 per group. \*  $p < 0.05$ , \*\*  $p < 0.01$  vs. 4m. m=month.

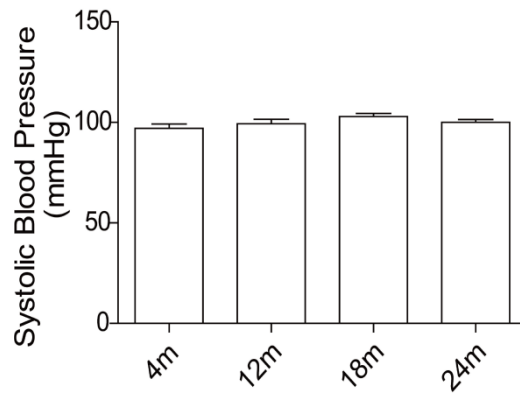

**Supplementary Figure 2. Systolic blood pressure of the mice.** Compared with 4m group, Systolic blood pressure had no significant changed with aging. Data are represented as mean +/- SEM. n = 6 per group. m=month.

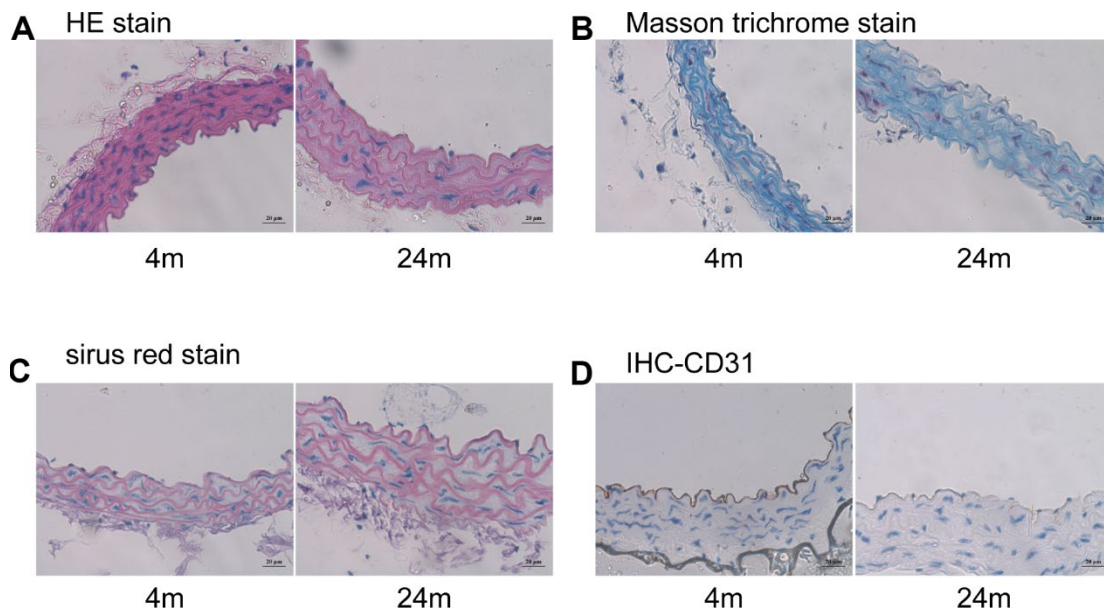

**Supplementary Figure 3. Thoracic aorta endothelium damaged in aged mice.** (A) HE staining of thoracic aorta; (B) Masson trichrome stain of thoracic aorta; (C) Sirius red stain of thoracic aorta; (D) immunohistochemistry staining of endothelium marker CD31 of thoracic aorta. m=month. n = 6 per group. bar=20 $\mu$ m.

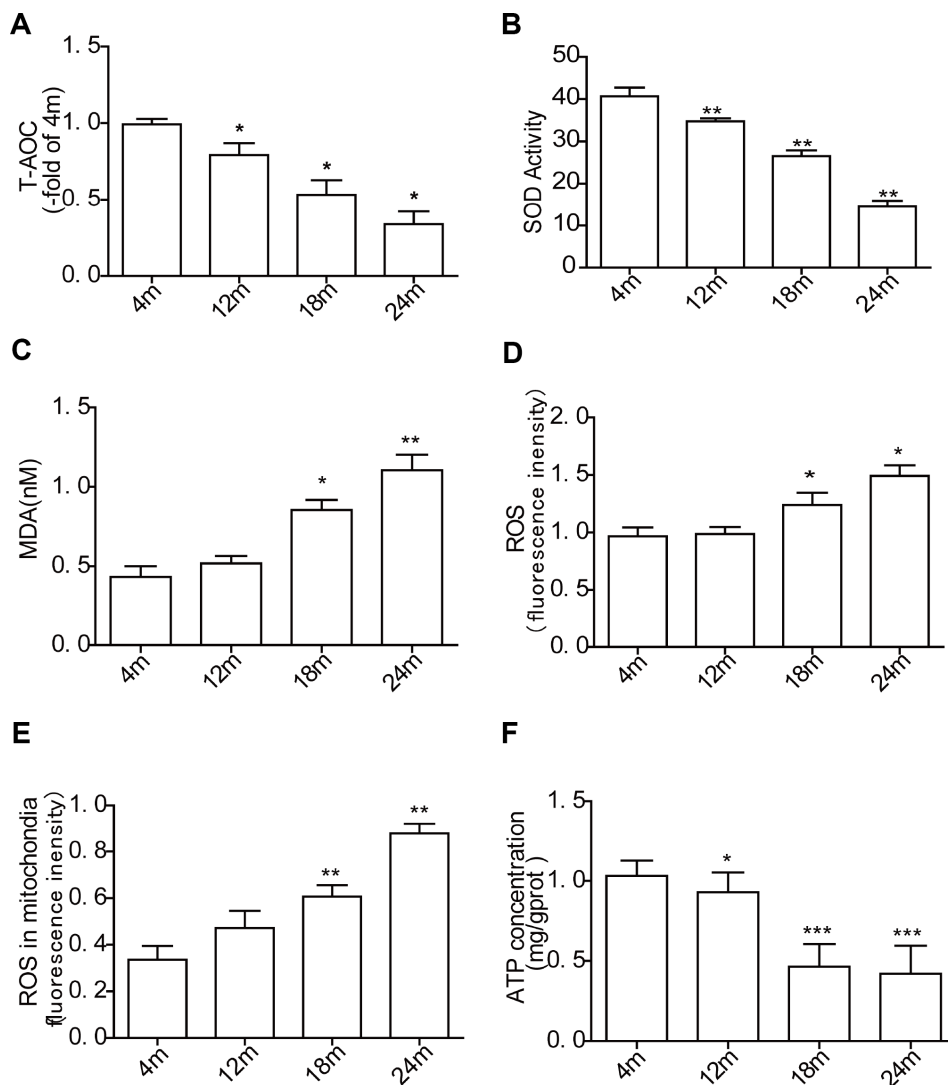

**Supplementary Figure 4. Antioxidation ability decreased and oxidative stress increased in aged heart.** Total antioxidant activity (T-AOC) decreased (A), SOD activity decreased with age (B), and malondialdehyde (MDA) increased (C) in aged myocytes. The production of ROS in general (D) and mitochondrial in particular (E) was increased in aging heart, ATP was decreased in aging myocardium (F), compared with 4 month old mice. Data are represented as mean +/- SEM. n = 6 per group. \*  $p < 0.05$ , \*\*  $p < 0.01$ , \*\*\*  $p < 0.001$  vs. 4m. m=month.

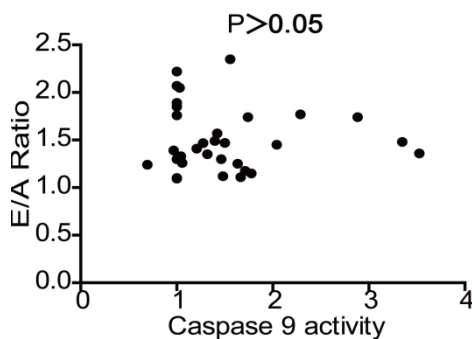

**Supplementary Figure 5. No correlation between caspase-9 activity and diastolic function.** n=32.
